# Supplementary material for: Personality and Cooperation: Cooperativeness Trait as a Robust Predictor of Cooperative Behavior
Source: Preprints.org preprint supplement (doi:10.20944/preprints202407.0952.v1), 2024-07-12
Supplement: Supplementary file 1 [file supplementary]

## Sheet: input
group	proptime_dgmean	tasksync	sex	Cooperativeness	Cooperative_behavior
1	0.0466667	NaN	M	1.33333	1.4
2	0.0566667	0.3536	F	0.533333	0.8
3	0.17	NaN	F	2	2
4	0.00333333	NaN	F	0.5	1
5	0.13	NaN	M	1.66667	2
6	0.0666667	NaN	M	0.833333	1.16667
7	0	NaN	M	1	1.46667
8	0.0266667	NaN	M	1.5	1.66667
9	0.03	NaN	F	0.333333	1.33333
10	0.0133333	NaN	F	0.733333	1.33333
11	0.133333	0.3536	M	1.2	2
12	0	0.388683	F	0.833333	1.13333
13	0.136667	0.336748	F	1.33333	2
14	0	0.337556	M	1	2
15	0.0833333	0.20988	F	1.66667	2
16	0.0133333	0.506877	F	0.8	0.833333
17	0.04	0.265394	M	0.333333	0.833333
18	0	0.452011	M	0.5	0.5
19	0.133333	0.339192	M	1.23333	1.33333
20	0.0766667	0.318132	M	1	2
21	0.156667	0.299288	F	1.66667	2
22	0.16	0.315038	F	0	0.0666667
23	0.376667	0.333115	F	1.66667	2
24	0.196667	0.561621	F	1.66667	1.5
25	0.02	0.368742	F	1.33333	1.66667
26	0.0866667	0.35391	F	0.966667	2
27	0.193333	NaN	M	2	2
28	0.07	0.397225	M	1.32	2
29	0.06	0.525352	M	1.16667	2
30	0.48	0.300795	M	2	2
31	0.186667	0.283487	M	0.833333	1
32	0.21	0.375254	F	1.5	1.66667
33	0.143333	0.452121	M	2	2
34	0.0366667	0.28651	F	0.966667	1.16667
35	0.02	0.369432	M	1	0.5
36	0.02	0.311793	M	1	1.66667
37	0.126667	0.382304	M	1.5	1.5
38	0.113333	0.45116	M	1.33333	2
39	0.0566667	0.358427	M	1.33333	2
40	0.276667	0.385785	F	0	2
41	0.0866667	0.340017	F	0.986667	1.38
42	0.06	0.40407	F	1	0.6
43	0.0966667	0.309753	F	1.33333	1.33333
44	0.08	0.409149	M	1.5	1.5
45	0	0.247994	M	0.866667	0.866667
